# Supplementary material
Source: PubMed Central journal article supplement (PMC1435804)
Supplement: plntphys_140_4_1142__1.pdf [file plntphys_140_4_1142__1.pdf]

# 1: At\_CNA  
# 2: bCh\_Chut02001746  
# Matrix: EBLOSUM62  
# Gap\_penalty: 15.0  
# Extend\_penalty: 0.6  
#  
# Length: 147  
# Identity: 35/147 (23.8%)  
# Similarity: 60/147 (40.8%)  
# Gaps: 14/147 ( 9.5%)  
# Score: 75.6  
#  
#  
#=====

|               |    |                                                                               |     |
|---------------|----|-------------------------------------------------------------------------------|-----|
| At_CNA        | 1  | WICQSYRGYMGVELLKSNSDGNESILKNLWHHTDAIICCSMKALPVFTFA                            | 50  |
|               |    | .:.:     ...  :.:. . .: .:.:. . : .:.:.:.:.:.:. .      .:.:                   |     |
| bCh_Chut02001 | 1  | MLIESYREITGIQLFDNTY-SDEYLSCLLYHAPFVVVSHGIEADPVFNYG                            | 49  |
| At_CNA        | 51 | NQAGLDMLE-----TTLVALQDISLEKIFDDNGRKTLCSEFPQIMQOGF                             | 94  |
|               |    | .....:..     :.:.:.:.:. . :.:.    :. .     .....                              |     |
| bCh_Chut02001 | 50 | NLTAQQLWHIDWEQFTTTPSRLSAEPERAED---RQRLLE---AATHGF                             | 93  |
| At_CNA        | 95 | ACLQGGICLSSMGRPVSYERAVAWKVLNEEENAHCICFVFINWSFV                                | 140 |
|               |    | .....    :.:.    :.:. . :.:. . :.:. . :.:. . :.:. . :.:. . :.:. . :.:. . :.:. |     |
| bCh_Chut02001 | 94 | ISNYTGIRISSKGQRFKIEQVLLWNLKNNSGEKIGQAALFRNWTNVK                               | 140 |
