# Supplementary material
Source: PubMed Central journal article supplement (PMC1435804)
Supplement: plntphys_140_4_1142__2.pdf [file plntphys_140_4_1142__2.pdf]

**A**

>Cre\_CC-1690 Chlamydomonas reinhardtii MEKHLA domain containing protein

MQMSHRVSR AATGLGCRRSVVAVPVVAAPRRICILA AAKKGD KGGKGGK GAKKSALADLLKKKKEEATGSAAATEGASNAVP  
 ADCVSPEGRMLVFTLADSYR LTKKYLLEGVDFEKLPAALFRAPFALLAHNKFQEGVKDPVYIYGNRAALDLFEKSWDDL  
 LKMP S RLSAPVDESAQTDRDGLLEKAAKTGYVTGYEAWRVSS TGRRFKIKDVT LFNLI DRSGTKIGQAAVFSQYETEDGV  
 VHTIKGSEPDVEEEAAAAGPAIPTPEEIEAAEA AVAEQAAHVRS LKEVQGLQNN DIPVQI AVMELKKRKEKLAALQKALD  
 DALAASKAAFDDDDDE.

**B**

Query sequence: Cre\_CC-1690; selected matches from PSI-blast searches:

gi|30138191|emb|CAD84197.1| conserved hypothetical protein [Nitrosomonas  
 europaea ATCC 19718] + gi|30248305|ref|NP\_840375.1| Length=162

Score = 101 bits (251), Expect = 1e-20, Method: Composition-based stats.  
 Identities = 61/150 (40%), Positives = 90/150 (60%), Gaps = 17/150 (11%)

|       |     |                                                                 |     |
|-------|-----|-----------------------------------------------------------------|-----|
| Query | 92  | VFTLADSYR LTKKYLLEGVDFEKLPA A-----LFRAPFALLAHNKFQEGVKDPVYIYGN   | 146 |
|       |     | V L +SY T +YL + KL A+ L +APFAL++H DP++ YGN                      |     |
| Sbjct | 15  | VAILQESYRHYTG RYLFD----PKLGASEAIVWLEQAPFALVSHGT----QDPPIFN YGN  | 66  |
| Query | 147 | RAALDLFEKSWDDLLKMP S RLSA-PVDESAQTDRDGLLEKAAKTGYVTGYEAWRVSS TGR | 205 |
|       |     | + AL LF +WD+ +MPS RLSA PVD + +R LL+ ++ GY+ Y R+++ GR            |     |
| Sbjct | 67  | QTALQLFGMTWDEFTRMP S RLSAEPVDRA---ERTRLLDHVSRDGYIDDYTGVR IAADGR | 123 |
| Query | 206 | RFKIKDVT LFNLI DRSGTKIGQAAVFSQYE                                | 235 |
|       |     | RF I+ T++NL+D SG GQAA+ ++E                                      |     |
| Sbjct | 124 | RFLIRHATVWNLLDESGRFYGQAAMIPEWE                                  | 153 |

**C**

gi|72121282|gb|AAZ63468.1| PAS [Ralstonia eutropha JMP134] +  
gi|46131006|ref|ZP\_00169006.2| COG0642: Signal transduction histidine kinase  
[Ralstonia eutropha JMP134] + gi|73537945|ref|YP\_298312.1| PAS [Ralstonia  
eutropha JMP134] Length=639

Score = 56.2 bits (135), Expect = 4e-07, Method: Composition-based stats.  
Identities = 25/89 (28%), Positives = 37/89 (41%), Gaps = 4/89 (4%)

Query 146 NRAALDLFEKSWDDLLKMP-SRLSAPVDESAQTDRDGLLEKAAKTGYVTGYEAWRVSSTG 204  
NR A + +++ SR P D A+ LE A + G V + WRV G  
Sbjct 45 NRG AQRIKGYEASEIIGSHFSRFY-PEDSIARGWPQKELELARRHGRVED-KGWRVRKDG 102

Query 205 RRFKIKDVTLFNLI DRSGTKIGQAAVFSQ 233  
RF +V + L + +G IG A +  
Sbjct 103 TRFW-ANVVITALHNEAGEIIGFAKITRD 130

Score = 41.5 bits (97), Expect = 0.011, Method: Composition-based stats.  
Identities = 21/89 (23%), Positives = 34/89 (38%), Gaps = 4/89 (4%)

Query 146 NRAALDLFEKSWDDLLKMP-SRLSAPVDESAQTDRDGLLEKAAKTGYVTGYEAWRVSSTG 204  
N A + +++ S P ++ A + L+++A + G V E WR+ G  
Sbjct 173 NAGAAQIKGYRSSEIVGRHFSTFYLP-EDVAAGKPERLIQRAREHGSVQD-EGWRMRKDG 230

Query 205 RRFKIKDVTLFNLI DRSGTKIGQAAVFSQ 233  
F VTL + D G A V  
Sbjct 231 SLFW-ASVTLTAIYDEHRQLRGFAKVTRD 258

---

**D**

gi|27350430|dbj|BAC47441.1| two-component hybrid sensor and regulator  
[Bradyrhizobium japonicum USDA 110] + gi|27377287|ref|NP\_768816.1| two-  
component hybrid sensor and regulator [Bradyrhizobium japonicum USDA 110]  
Length=634

Score = 53.0 bits (126), Expect = 2e-05, Method: Composition-based stats.  
Identities = 27/88 (30%), Positives = 38/88 (43%), Gaps = 2/88 (2%)

Query 146 NRAALDLFEKSWDDLLKMPSRLSAPVDESAQTDRDGLLEKAAKTGYVTGYEAWRVSSTGR 205  
N A L S D+++ L P ++ A+ L+ AA+TG + E WRV G  
Sbjct 18 NSGAERLKGYS ADEIIGKSFSLFYPPEDRAKELPQTALKIAAETGRFSS-EGWRVRKDG 76

Query 206 RFKIKDVTLEFNLIDRSGTKIGQAAVFSQ 233  
RF V + + D G IG A V  
Sbjct 77 RFW-ALVVVDAIRDEQGQVIGFAKVTRD 103

Score = 48.7 bits (115), Expect = 3e-04, Method: Composition-based stats.  
Identities = 23/93 (24%), Positives = 34/93 (36%), Gaps = 4/93 (4%)

Query 146 NRAALDLFEKSWDDLLKMP-SRLSAPVDESAQTDRDGLLEKAAKTGYVTGYEAWRVSSTG 204  
N A + D+++ SR P ++ L +AAK G E WRV  
Sbjct 146 NPGAQRIKGYDPDEIIGQHFSRFYTP-EDIQTGVPKRALAEAAKLGRFEA-EGWRVRKDS 203

Query 205 RRFKIKDVTLEFNLIDRSGTKIGQAAVFSQYETE 237  
RF V + + D +G +G A V  
Sbjct 204 SRFW-ASVVIDRITDEAGELVGFVKVTRDVTER 235
