# Supplementary material
Source: PubMed Central journal article supplement (PMC1435804)
Supplement: plntphys_140_4_1142__6.pdf [file plntphys_140_4_1142__6.pdf]

>MBNC1\_ZP\_00196381\_p1 [Mesorhizobium sp. BNC1] MesodRAFT\_4420  
YRLLVEAITDYAVYMLDIDGYVSVWNPQAQRFKGYEASEIIGQHFSQFYTPEDREAGLPQKALAVAAS  
EGRYEAEGWRLRKDGSRFWTHAVIDPIRDPAGRLIGFAKITRDLTER

>MBNC1\_ZP\_00196381\_p2 [Mesorhizobium sp. BNC1] MesodRAFT\_4420  
FRILLVQGVTDYAIFFMLDPNGRIISWNAKAKRIKGYDASEIIGQHFSRFYMEDERERGEREPQGLKTAAK  
EGHFEKEGWRVRKDGSRFWASVVIDAIRDERGELIGFAKVTRDITEK

>N7120\_all5327 Nostoc sp. (strain PCC 7120)  
YRLLVEGVNTYAIFFMLDSNANFTTWNIGAERILGYQEAEIIGQPFELIFAPEAIERGQPOQVLKQALT  
EGFSRENWRHWRKDGTFWFHCLITPLRDENGNLRGFSKIMQDITER

>Re\_Raeut03000161\_p1 [Ralstonia eutropha JMP134]  
FRTLIVETISDYAIFLLDLDGTITSWNRGAQRKIKGYEASEIIGSHFSRFYPEDSIARGWPQKELELARR  
HGRVEDKGRWRKDGTRFWANVVITALHNEAGEIIGFAKITRDMTDQ

>Re\_Raeut03000161\_p2 [Ralstonia eutropha JMP134]  
FRLLVLNVKDYAIFMLDPHGNVSVWNAQAQIKGYSSEIVGRHFSTFYLPEDVAAGKPERLIQARARE  
HGSVQDEGWRRKDGSLFWASVTLTAIYDEHRQLRQGFQVTRDMSER

>Bj\_bll2176\_p1 [Bradyrhizobium japonicum USDA 110] NP\_768816  
MDYAIYMIDVDGTVRSWNSGAERLKGYSADDEIIGKSFSLFYPPEDRAKELPQTALKIAAET  
GRFSSEGWRVRKDGTRFWALVVDAIRDEQGVIGFAKVTRDITER

>Bj\_bll2176\_p2 [Bradyrhizobium japonicum USDA 110] NP\_768816  
YRRLIEAVVDYAIFFQLDPAGNITTWNPQAQRKIKGYDPDEIIGQHFSRFYTPEDIQTGVPKRALAEAAKL  
GRFEAEGWRVRKDGSRFWASVVIDRITDEAGELVGFQVTRDVTER

>Pp\_PP3835 [Pseudomonas putida KT2440] AAN69429  
YEQLVQSVVDYAIYMLDPSGHVSVWNAQAQRKIKGYRRDEVIGKHFSLFFTPQDCADGRPERLLCQALEQ  
GVAQDEGWVRKDGTVQFWALAAALDVIRDESGQIIGLAKVTRDITDR

>Pa\_Paer03003920\_p1 [Pseudomonas aeruginosa UCBPP-PA14] ZP\_00139866  
NRLLEAVDDYAIHTLDSAGRIASWSAGAARLFGHDASEILGCDYACFHTRKDRDAGVPQALRQADAE  
GRFETEGWRVRSNGKRFWAQVVIDAIRDSQGLLGFQVTRDITDR

>Pa\_Paer03003920\_p2 [Pseudomonas aeruginosa UCBPP-PA14] ZP\_00139866  
FRLLVQSVTDYAIYMLDHRGRITNWNLGAQRKIKGYLPEEVIGRHFSCFYTPEDREAGEPARGLAAAER  
EGRFEKEGWRVRKDGSRFWANVVIDPIRDSDGRLIGFAKVTRDITDR

>Sm\_SMa0113\_p1 [Sinorhizobium meliloti 1021] NP\_435303  
YEALITSAPTALDAIPGAVYVCDHEGWLVGYNAEAAELWGRQPSLSAPRERFCGSQRLFLSDGSPMDHQECPMA  
EAIKTGVSTRNAEVIIERPDGSRIFALVNIRPLRDHRGVIQGAINECFQDISQQ

>Sm\_SMa0113\_p5 [Sinorhizobium meliloti 1021] NP\_435303  
LASIVRFSDDAIVSKDTQGIQITWNKGAERLFGYSAAEEVIGKPINILIPPDRQGEPEGILERIRRDE  
HIDHYETVIRKDGSLIDVSLTVSPLKDARGRVVGASKIARDITER

>Bc\_ZP\_00422404 [Burkholderia vietnamiensis G4] Bcep1808DRAFT\_5496  
FQTVVSSITDYAVFMLDTHGNVATWNAQAERIKGYREDEIVGRHFSSRFYPPDAIAAGRPAQALETAVA  
SGHFQDESWRIRKDGSRFWASVTITAVRDESNTLRGFIKITRDMTER

>Bc\_ZP\_00425892\_p1 [Burkholderia vietnamiensis G4] Bcep1808DRAFT\_1771  
YRSLVDAIRDYAIFFLLDPTGHVASWNAQAERIKGYRADEIIGQHFSVFYPSDAQQRYPAEELARAVT  
LGRWEDEGWRRKDGSRFWANVVITPLRDRDGMVGFQVTRDLTER

>Bc\_ZP\_00425892\_p2 [Burkholderia vietnamiensis G4] Bcep1808DRAFT\_1771  
LRLLMDAVEDAVFMLDPDGHITSWNAKAKRLKGFEPAEIIGHVSRFYPAEDIAARKPERELATAAAQ  
GRVEDEGWRLRKDGSRFWANVVITAVYGPAGKLLGFQVTRDMTER

>Hm\_AAV47403\_p1 [Haloarcula marismortui ATCC 43049] rrnAC2616  
MFGLDDTGRLLTFATNEFAALLDRTPDELVGTPEALVTAEDRETLTATRQAVSSASDRMT  
RTCQVTLPOSGRSRPVTLAATDDGSVVGSLCRTAETTD

>Hm\_AAV47403\_p2 [Haloarcula marismortui ATCC 43049] rrnAC2616

FQYLFDLIQDAVVGFIEIVNFVPIVRTVNPFAVDTFGYDREEIVGEPLENEYIVPGDRVEEAVNYDQRTAS  
GEINYAVVSRKTADGCREFIYRGVPHYDTADGRRRCGFAMYTDVTDSTRRQKR

>Cv\_CV3259\_p1 [Chromobacterium violaceum ATCC 12472] AAQ60923 new  
FELLIQFVEDHAIILLDPDGLIRSWNAGAERIHGHTVPQALGRHFSCLLPPADDAYLQA  
MRELSQAAQDGRYAGERWHVRNDGSRFLADILLVPLRDAGGELRGYAKITRDLSHR

>Cv\_CV3259\_p2 [Chromobacterium violaceum ATCC 12472] AAQ60923 new  
FCQVVQESPAMIMINGAGSIILSNRLAEAMFGYPGDELGMSIEKLMPEFRG  
RHGHLRQGFRLRQPEARPMGVGRDLYGLRKDGCEFFIEIGLNPETEAGPMVLAGIVDITA  
RKQTOR

>Cv\_CV3248\_p4 [Chromobacterium violaceum ATCC 12472] AAQ60912  
LAEALNQAAQPILMVDAEDRVTYANPAYTALMGYSRDELIGIQANQLAPGADQAERDIIKQKILT  
EGSWSGELARLDSQGRSIPVYASAAALHDQAGTLEGYVVVYADLRPLQEKSLAL

>Cv\_CV1621\_p1 [Chromobacterium violaceum ATCC 12472] AAQ59297  
LAAIVEGSVDAIISKTLDGVVTSWNLSEERLFGYRADEAVGQPLAKLIVPEDRRGEE  
VDILRRIARGERIEHFETVVRMRKDGSLIVSVSISPVLDEAGR VVGASKVLRDLSEQ

>Cv\_CV1621\_p4 [Chromobacterium violaceum ATCC 12472] AAQ59297 new  
LSNVLRAASEVAIIAADVHGVSLSFNLSGAQRMLGYSENEVMGRAMLTHFHLPEE  
LREHGALSQRYSRQVEGLRALVQEPPEASGAETREWTYVRKDGSQLQVSLMVTAMRDADE  
LVVGYLAIAADITIP

>Af\_AF1620\_p1 [Archaeoglobus fulgidus DSM 4304] NP\_070449  
FREILLEHSVDAIVILDVDSRITVWNRGAEMMFGYTAEEAVGKPLNFLMPKERWQQCTENFKRAVVEG  
HVKDIEAPRIRKDGEMIIVDQTLTSHDSNGEVIGFVAIMRDITRR

>Af\_AF1620\_p2 [Archaeoglobus fulgidus DSM 4304] NP\_070449  
LASIVENSNDAIYSVNLEGGKITSWNRTAERLFGWRRDEALGMPASKLLPEEIKGETEFTIIRRIRE  
GESGLRFETRRLRKDGVIDVEVTVSPLLNEMGELSGISITRDISEK

>Rp\_RPA0754\_p1 [Rhodopseudomonas palustris CGA009] NP\_946107  
FAAIVQNSFDAIVSKDVEGNVQSWNPAAEQIFGWTADEMIGNSIRVLIPPDRQHEEDDILQIRITGEM  
VPKFETERLHKSGRRIHVAVTVSPLRDPDGRIVGASKIAHDITET

>Rp\_RPA0754\_p2 [Rhodopseudomonas palustris CGA009] NP\_946107  
FRSLANSIPQLAWIAESDGTVFWYNDRWFDYTGTTLEQLRSGSGWTALHHPDHLERVRSKLOHSWDT  
GEAWEDTFPLRGKDGGEYRWFSLSRAMPLRDDSGEVWRWFGTNTDITVQ

>Bj\_blr0385\_p1 [Bradyrhizobium japonicum USDA 110] NP\_767025  
FSAAVQSSDDSIVLQTLDGIIIGWNAEAERLYGYSAAEEAIGQPTSILLPPDRREEGKDYLRRIARG  
ERIEHFETVRLRKDGSPVEISVLSPIRGPSGEIIGASGSARSLEA

>Bf\_Bcep02000013\_p1 [Burkholderia fungorum LB400] ZP\_00283544  
SVRWVESVSDYAI FALS PDGRIQSWNPGEAIYGYRRDEVLGQPLDILYTEEERSKGLPAAGLETARR  
THRYDTEGWVRKDGTVFVWASVVTTLRAEDGQITGFAKIVRDMTDK

>Bf\_Bcep02000013\_p2 [Burkholderia fungorum LB400] ZP\_00283544  
FRMLVHGVTDYAIYMLSPEGIITNWNPGARRIKGYTAEEVIGSHFSRFYTPEDAAAGLPQHGLAVAAR  
EGRFEAEGWRVVRNGERFLAHVVIDAIRDDDGMLAGFAKITRDITERS

>Bf\_Bcep02007382\_p1 [Burkholderia fungorum LB400] ZP\_00277932  
ASQWVASTEDYSVFLITSEGDVSWNPGGTRIEGYQLEEIIGRNFSSTLYTDEDRGNGVDPDAVLESVLO  
RGRHESEGWRRQKDGTHFVWASVVTGLRDPGEFRGAVQIVRDVGEK

>Bf\_Bcep02007382\_p2 [Burkholderia fungorum LB400] ZP\_00277932  
FRLLVQGVTDYAI FMLSPEGYVTNWNPGARRIKGYSEQEIIGSHFSRFYKPEDVAAGKPQRGLETAAR  
EGRFEAEGWRVRRDGTTFWAHVVIHAIRDDEGTLIGFAKVTRDVTTER

>Bf\_Bcep02000999\_p1 [Burkholderia fungorum LB400] ZP\_00284503  
YWALMQAIEDYAI FLLDATGRIVSCNTGALKQAGYTEREIIIGQHFSCFYTEDAVARDWPAYELQQASL  
TGRFEDEGWVRKNGTTFWNSNVVITAIRNDAGILTGFAKITRDLTAR

>Bf\_Bcep02000999\_p2 [Burkholderia fungorum LB400] ZP\_00284503  
FRLLVDSVKDYAIFMLDPQGNVVSWEAARIKGYTREEIVGRHFSTFYPPEDAAAGKPARELAIARQ  
IGHVEDEGWVRKDGTTFFWANVNITAVYDESKRLCGFAKVTRDLTER

>Mm\_MM2748\_p4 [Methanosarcina mazei Gol] NP\_634772  
YRNIVETANEIILLITDSEAVINYANSKVVDMLEYPLDEVIGKPIWGFISKECIPAVRQNLKRRQG  
ISESYELKLIRKDGSPVWTFFLNAKPLFDRNGSFTGVMSMLTDISKR

>Np\_Npun02005975 [Nostoc punctiforme PCC 73102] ZP\_00107821  
YRLLVEGVNTNYAIFMLDPNGNVTTWNIGAERILGYQAEIIGQPFERVFSPPEAIKQGLPKQVLRKAV  
AEGFSRENRWHIRKDGTTFFWAHCLITPLLLDDGDLRGRFSGKIMQDITER

>Xa\_AAM36536 [Xanthomonas axonopodis pv. citri str. 306]  
NRQILDSVMDYAIATDMHGRVTSWNEGARRILGWSEAEMLGQTLQRTFTPEDVEQRQLLIEAAAAL  
ESGSGMDERWHVRKSGERFWANGSLMVLREETGEAIGFVKVLRDRTAE

>Bj\_FixL\_p1 BAC48025 [Bradyrhizobium japonicum USDA 110]  
FRVRIEGFGVGTWDLDLKTWALDWSDTARTLLGIGQDQPASYDLFLSRLEPDDRER  
VESAIKRVSERGGGFDVSVFRVAGTSNAGQWIRARAGLIRDEAGTARHLSGIFLDIDEE

>Bj\_FixL\_p2 structure done BAC48025 [Bradyrhizobium japonicum USDA 110]  
THLRSILHTIPDAMIVIDGHGIIQLFSTAAERLFGWSELEAIGQNVNLMPEPDRSRHDS  
YISRYRTTSDPHIIGIGRIVTGKRRDGTTFPMHLSIGEMQSGGEPYFTGFVRDLTEH

>Sm\_FixL (corresponds to Bfixl p2) [Sinorhizobium meliloti 1021] NP\_435916  
LRSILDTVPDATVVSATDGTIVSFNAAAVRQFGYAEVEVIGQNLRLMPEPYRHEHDG  
YLQRYMATGEKRIIGIDRVVSGQRKDGSTFPMKLAVGEMRSGGERFFFTGFIRDALTER
