# Supplementary material
Source: PubMed Central journal article supplement (PMC1435804)

M

PAS

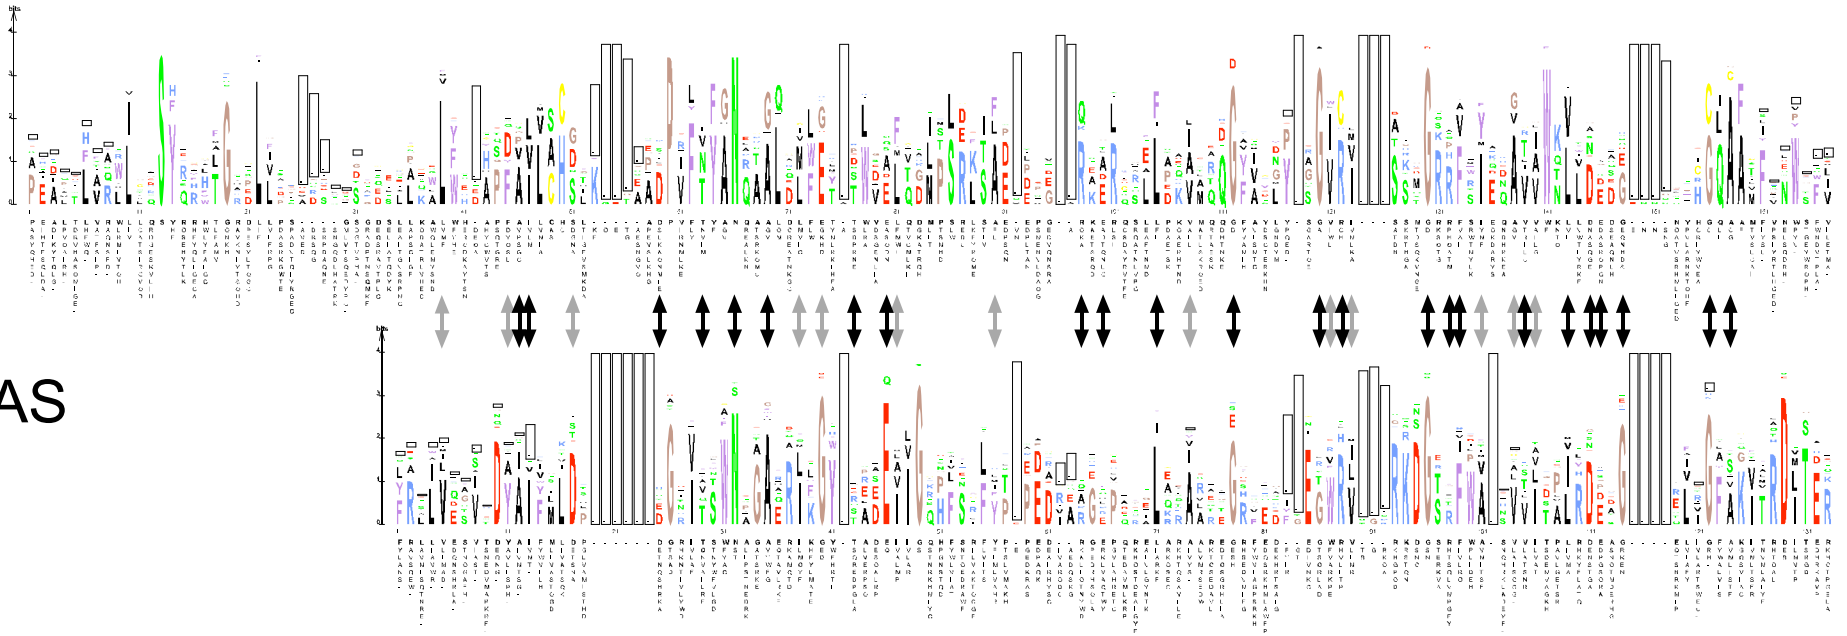

PAS (CCD)

PAS (SMART)

PAC (SMART)

Supplement: plntphys_140_4_1142__4.pdf [file plntphys_140_4_1142__4.pdf]

# A

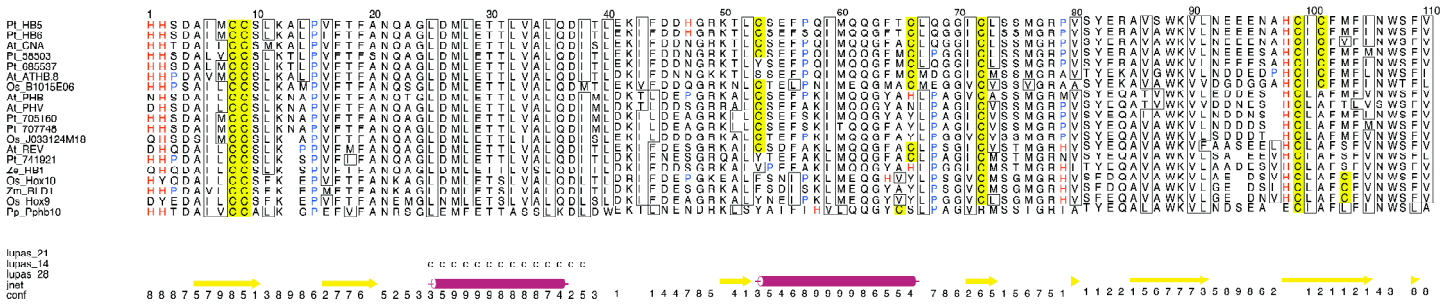

# B

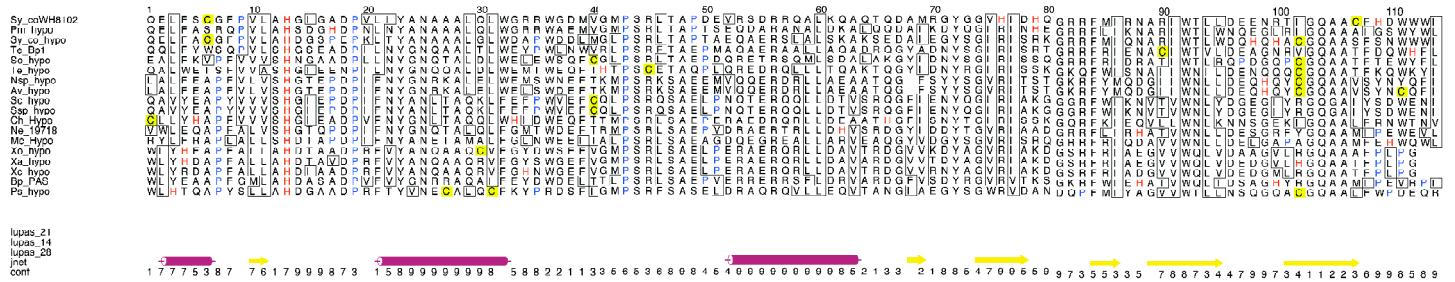

# C

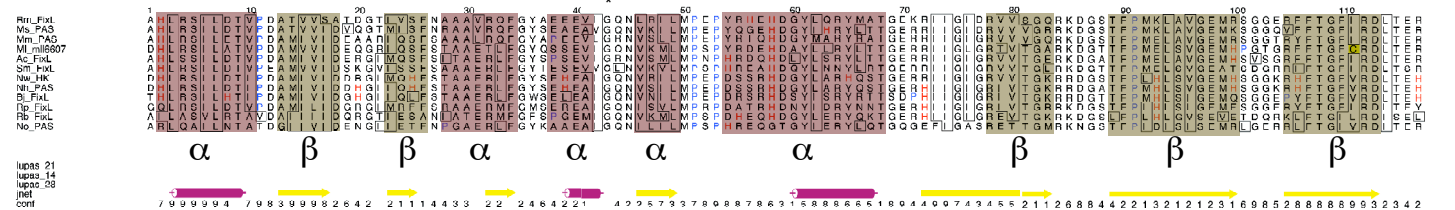

Supplement: plntphys_140_4_1142__5.pdf [file plntphys_140_4_1142__5.pdf]
